# Supplementary material
Source: PubMed Central journal article supplement (PMC3033379)
Supplement: pgen.1001289.s001.pdf [file pgen.1001289.s001.pdf]

## **S1 Simulation Model 1**

For the first type of simulations (model 1) we used the software package Genome, a coalescent-based whole-genome simulator (Liang et al. 2007). We simulated a population with effective size  $N = 10,000$ , and randomly extracted 10,000 haplotypes from this population. The simulated region consists of 10 independent subregions, and each subregion contains 10 fragments; the recombination rate between consecutive fragments was taken as the default value (0.0001).
