# Supplementary material
Source: PubMed Central journal article supplement (PMC3033379)
Supplement: pgen.1001289.s003.pdf [file pgen.1001289.s003.pdf]

### S3 Power estimates when individual variants' PAR are sampled from an exponential distribution

| Sim. Model | Sample Size | Disease Model | #DSVs | PAR=0.03 |                 |       | PAR=0.05 |                 |       |
|------------|-------------|---------------|-------|----------|-----------------|-------|----------|-----------------|-------|
|            |             |               |       | C        | WS <sub>t</sub> | R     | C        | WS <sub>t</sub> | R     |
| 1          | 1000        | Uneq PAR      | 10    | 0.240    | 0.295           | 0.381 | 0.511    | 0.686           | 0.724 |
|            |             |               | 20    | 0.214    | 0.256           | 0.337 | 0.469    | 0.597           | 0.705 |
|            |             |               | 30    | 0.172    | 0.211           | 0.287 | 0.440    | 0.504           | 0.647 |
| 2          | 1000        | Uneq PAR      | 10    | 0.277    | 0.454           | 0.512 | 0.590    | 0.871           | 0.901 |
|            |             |               | 20    | 0.242    | 0.360           | 0.483 | 0.562    | 0.776           | 0.871 |
|            |             |               | 30    | 0.241    | 0.300           | 0.448 | 0.519    | 0.716           | 0.864 |

Table S-1: Power Estimates ( $\alpha = 0.05$ ) for the three approaches: Collapsing (C) vs. Weighted-Sum (WS<sub>t</sub>) vs. Replication-based (R) when individual PARs are sampled from an exponential distribution. Two genetic simulation models are assumed: neutral variants (1), and mildly deleterious variants (2). Varying number of DSVs are assumed. The sample size is the total number of individuals sequenced, with equal numbers of cases and controls. All tests are two-sided, i.e., testing for the presence of risk or protective variants in the region of interest.
